# Supplementary material for: Effective in situ repair and bacteriostatic material of tooth enamel based on salivary acquired pellicle inspired oligomeric procyanidins
Source: Royal Society of Chemistry journal article supplement (doi:10.1039/c6py01362g), 2016-01-01
Supplement: c6py01362g1.pdf [file c6py01362g1.pdf]

## Supporting Information

### **Effective in-situ repair and bacteriostatic material of tooth enamel based on salivary acquired pellicle inspired oligomeric procyanidins**

*Shuhui Zhang,<sup>a,#</sup> Libang He,<sup>b,#</sup> Yinxin Yang,<sup>a</sup> Bo Yang,<sup>a</sup> Yixue Liao,<sup>a</sup> Xinyuan Xu,<sup>a</sup>*

*Jiyao Li,<sup>b,\*</sup> Xiao Yang<sup>a,\*</sup> and Jianshu Li<sup>a,\*</sup>*

<sup>a</sup> College of Polymer Science and Engineering, State Key Laboratory of Polymer Materials Engineering, Sichuan University, Chengdu, 610065, China. Fax: 86-28-85405402; Tel:86-28-85466755; E-mail: [jianshu\\_li@scu.edu.cn](mailto:jianshu_li@scu.edu.cn) (JS. Li) ; [yangxiao4054@163.com](mailto:yangxiao4054@163.com) (X. Yang) ;

<sup>b</sup> State Key Laboratory of Oral Diseases, West China Hospital of Stomatology, Sichuan University, Chengdu, 610041, China. E-mail: [jiyaoliscu@163.com](mailto:jiyaoliscu@163.com); (JY. Li);

<sup>#</sup>These authors contributed equally to this work.

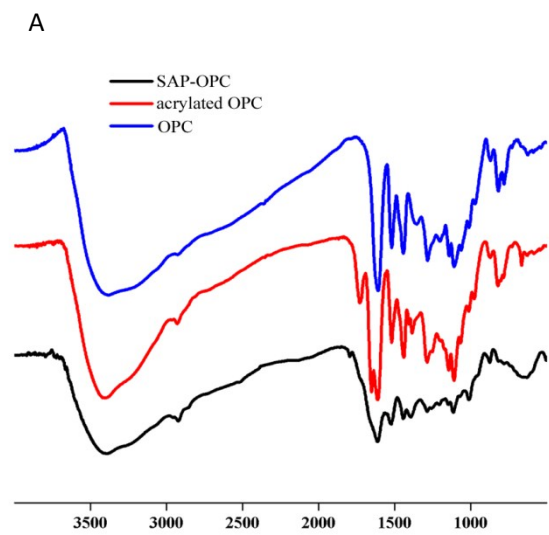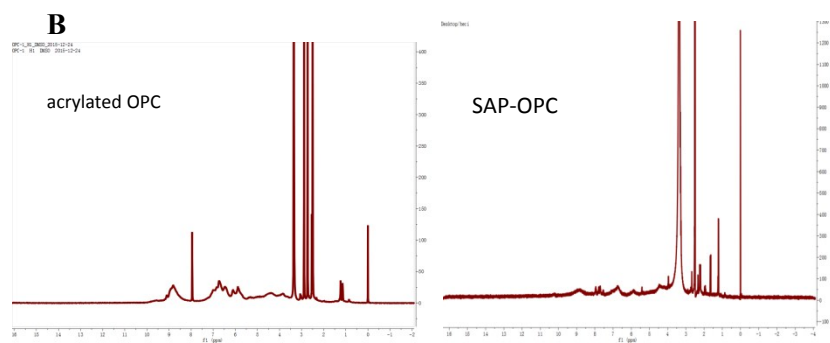

**Figure S1.** (A) FTIR data of OPC, acrylated OPC and SAP-OPC; (B)  $^1\text{H}$  NMR data of acrylated OPC and SAP-OPC.

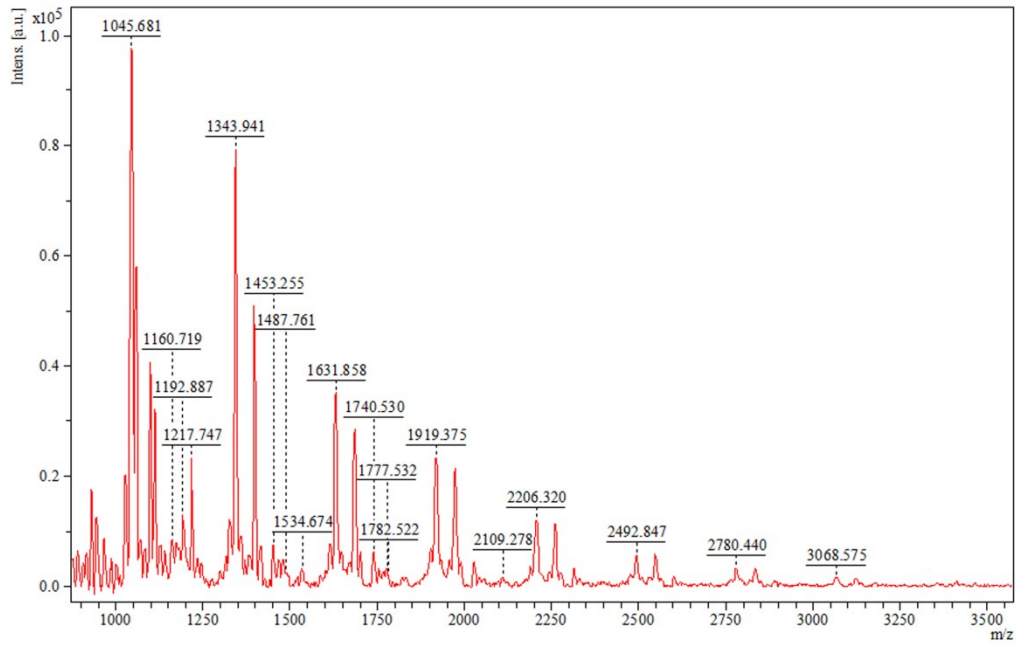

**Figure S2.** MALDI-TOF-MS date of SAP-OPC.

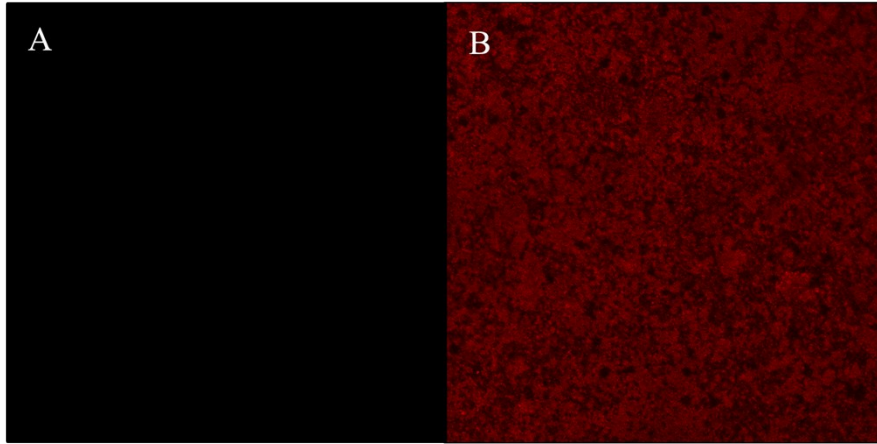

**Figure S3.** CLSM images of bare HA slice surface (A), and RB-labeled SAP-OPC treated HA slice surface (B).

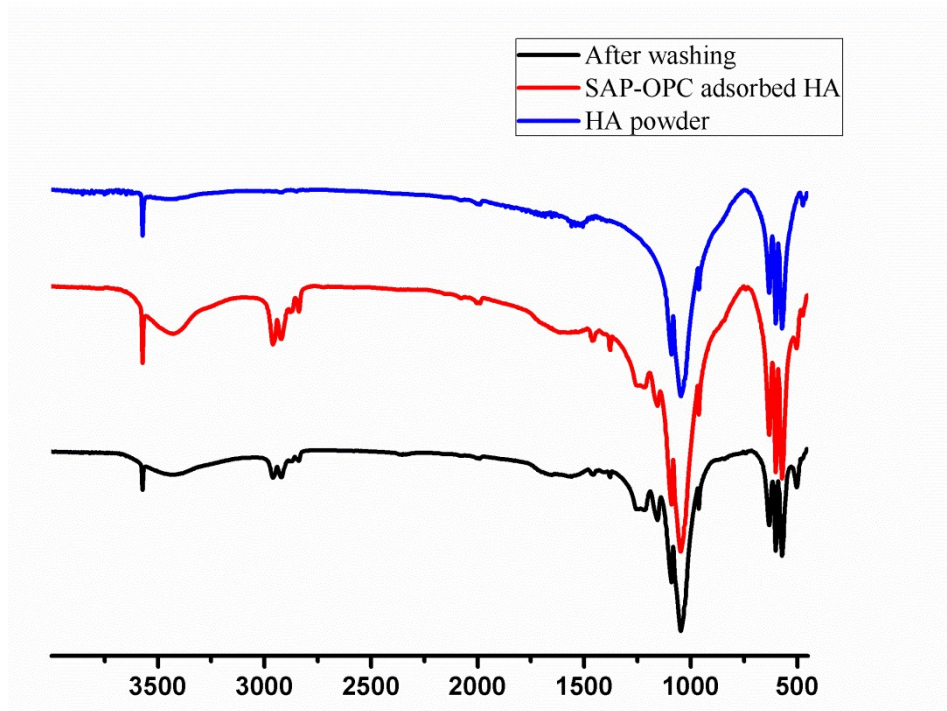

**Figure S4.** FTIR spectra of HA powder, SAP-OPC adsorbed HA, and the one after washing by deionized water.

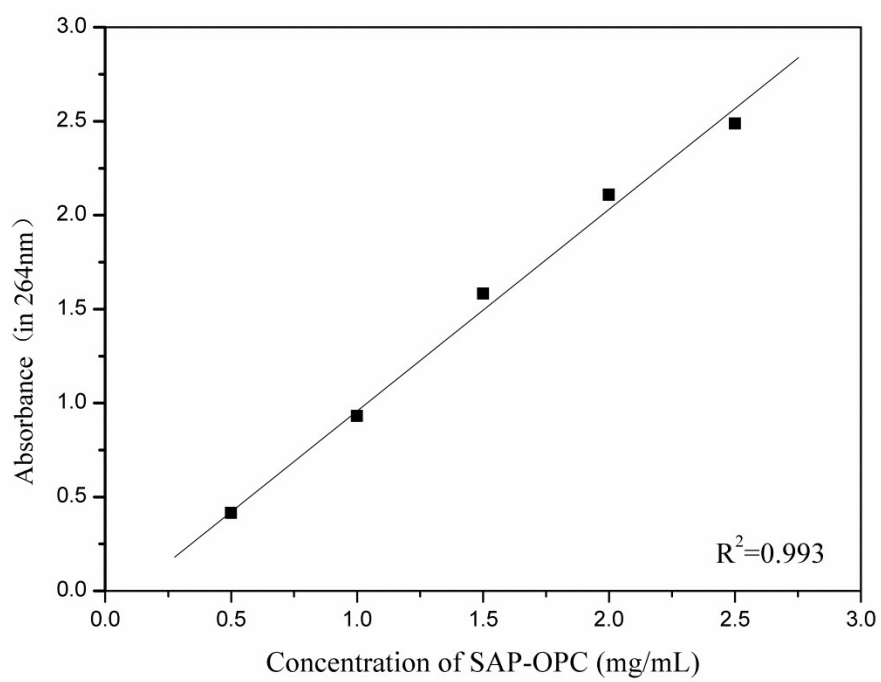

**Figure S5.** The standard absorbance-concentration curve of SAP-OPC by UV spectrum.

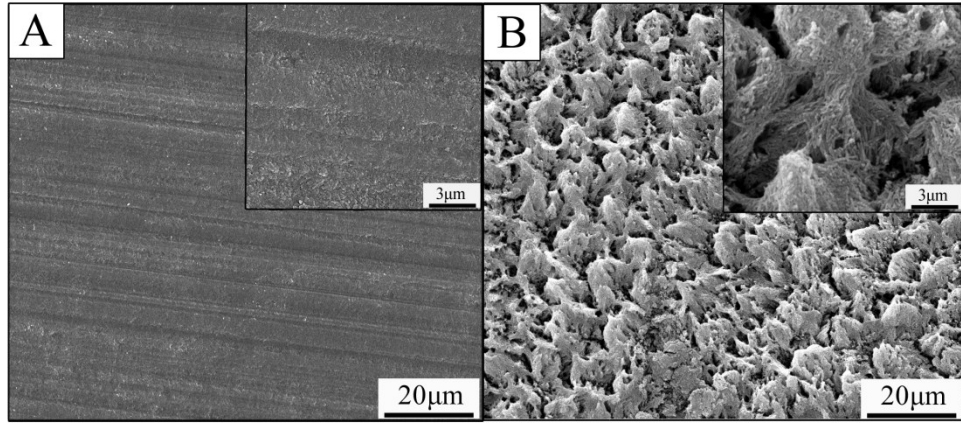

**Figure S6.** SEM images of the surfaces of normal tooth enamel (A) and acid-etched tooth enamel (B).

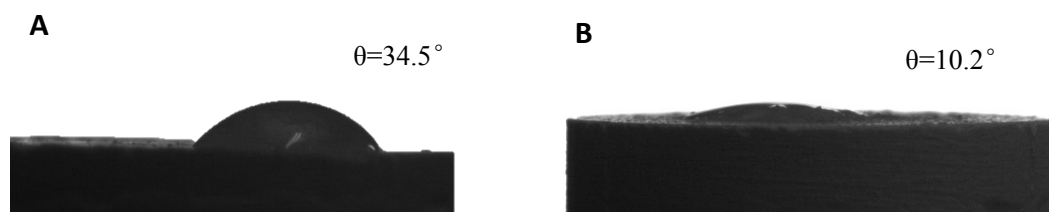

**Figure S7.** The water contact angle of bare (A) and SAP-OPC coated HA slices (B).
